# Supplementary material
Source: publisher site journal article supplement (https://www.dovepress.com/article/553046)
Supplement: Supplementary file 1 [file 553046%20Revised%20supplementary.docx]

**Supplemental Table 1. Response at the end of 1LOT by subtypes**

|  | | **Countries** | | | | |
| --- | --- | --- | --- | --- | --- | --- |
| **Variable** | **Category** | **All** | **France** | **United Kingdom** | **Germany** | **Italy** |
| **PTCL-not otherwise specified (PTCL-NOS), n (%)** | **N** | **51** | **11** | **19** | **19** | **2** |
| Complete response | 31 (60.8%) | 4 (36.4%) | 17 (89.5%) | 8 (42.1%) | 2 (100.0%) |
| Partial response | 12 (23.5%) | 4 (36.4%) | 0 (0.0%) | 8 (42.1%) | 0 (0.0%) |
| Stable disease | 4 (7.8%) | 2 (18.2%) | 0 (0.0%) | 2 (10.5%) | 0 (0.0%) |
| Progressive disease | 4 (7.8%) | 1 (9.1%) | 2 (10.5%) | 1 (5.3%) | 0 (0.0%) |
|  |  |  |  |  |  |  |
| **Angioimmunoblastic T-cell lymphoma (AITL), n (%)** | **N** | **33** | **15** | **5** | **5** | **8** |
| Complete response | 22 (66.7%) | 13 (86.7%) | 2 (40.0%) | 1 (20.0%) | 6 (75.0%) |
| Partial response | 8 (24.2%) | 2 (13.3%) | 3 (60.0%) | 2 (40.0%) | 1 (12.5%) |
| Stable disease | 0 (0.0%) | 0 (0.0%) | 0 (0.0%) | 0 (0.0%) | 0 (0.0%) |
| Progressive disease | 3 (9.1%) | 0 (0.0%) | 0 (0.0%) | 2 (40.0%) | 1 (12.5%) |
|  |  |  |  |  |  |  |
| **ALK-positive systemic anaplastic large cell lymphoma (sALCL), n (%)** | **N** | **25** | **3** | **9** | **8** | **5** |
| Complete response | 13 (52.0%) | 2 (66.7%) | 4 (44.4%) | 3 (37.5%) | 4 (80.0%) |
| Partial response | 6 (24.0%) | 1 (33.3%) | 3 (33.3%) | 2 (25.0%) | 0 (0.0%) |
| Stable disease | 2 (8.0%) | 0 (0.0%) | 0 (0.0%) | 2 (25.0%) | 0 (0.0%) |
| Progressive disease | 4 (16.0%) | 0 (0.0%) | 2 (22.2%) | 1 (12.5%) | 1 (20.0%) |
|  |  |  |  |  |  |  |
| **ALK-negative sALCL,n (%)** | **N** | **20** | **2** | **5** | **3** | **10** |
| Complete response | 12 (60.0%) | 2 (100.0%) | 1 (20.0%) | 1 (33.3%) | 8 (80.0%) |
| Partial response | 2 (10.0%) | 0 (0.0%) | 1 (20.0%) | 1 (33.3%) | 0 (0.0%) |
| Stable disease | 2 (10.0%) | 0 (0.0%) | 0 (0.0%) | 1 (33.3%) | 1 (10.0%) |
| Progressive disease | 4 (20.0%) | 0 (0.0%) | 3 (60.0%) | 0 (0.0%) | 1 (10.0%) |
|  |  |  |  |  |  |  |
| **Extranodal nasal NK/T-cell lymphoma, n (%)** | **N** | **3** | **1** | **2** | **0** | **0** |
| Complete response | 2 (66.7%) | 0 (0.0%) | 2 (100.0%) | 0 (0.0%) | 0 (0.0%) |
| Partial response | 1 (33.3%) | 1 (100.0%) | 0 (0.0%) | 0 (0.0%) | 0 (0.0%) |
| Stable disease | 0 (0.0%) | 0 (0.0%) | 0 (0.0%) | 0 (0.0%) | 0 (0.0%) |
| Progressive disease | 0 (0.0%) | 0 (0.0%) | 0 (0.0%) | 0 (0.0%) | 0 (0.0%) |
|  |  |  |  |  |  |  |
| **Adult T-cell leukemia/lymphoma (ATLL)** | **N** | **4** | **1** | **1** | **2** | **0** |
| Complete response | 2 (50.0%) | 0 (0.0%) | 0 (0.0%) | 2 (100.0%) | 0 (0.0%) |
| Partial response | 0 (0.0%) | 0 (0.0%) | 0 (0.0%) | 0 (0.0%) | 0 (0.0%) |
| Stable disease | 2 (50.0%) | 1 (100.0%) | 1 (100.0%) | 0 (0.0%) | 0 (0.0%) |
| Progressive disease | 0 (0.0%) | 0 (0.0%) | 0 (0.0%) | 0 (0.0%) | 0 (0.0%) |
|  |  |  |  |  |  |  |
| **Other, n (%)** | **N** | **4** | **2** | **0** | **0** | **2** |
| Complete response | 3 (75.0%) | 0 (2.9%) | 0 (0.0%) | 0 (0.0%) | 0 (6.9%) |
| Partial response | 1 (25.0%) | 0 (2.9%) | 0 (0.0%) | 0 (0.0%) | 0 (0.0%) |
| Stable disease | 0 (0.0%) | 0 (0.0%) | 0 (0.0%) | 0 (0.0%) | 0 (0.0%) |
| Progressive disease | 0 (0.0%) | 0 (0.0%) | 0 (0.0%) | 0 (0.0%) | 0 (0.0%) |
|  |  |  |  |  |  |  |
| **Enteropathy-associated T-cell lymphoma (EATL), n (%)** | **N** | **4** | **0** | **2** | **0** | **2** |
| Complete response | 3 (75.0%) | 0 (0.0%) | 1 (50.0%) | 0 (0.0%) | 2 (100.0%) |
| Partial response | 0 (0.0%) | 0 (0.0%) | 0 (0.0%) | 0 (0.0%) | 0 (0.0%) |
| Stable disease | 0 (0.0%) | 0 (0.0%) | 0 (0.0%) | 0 (0.0%) | 0 (0.0%) |
| Progressive disease | 1 (25.0%) | 0 (0.0%) | 1 (50.0%) | 0 (0.0%) | 0 (0.0%) |
|  |  |  |  |  |  |  |
| **Hepatosplenic T-cell lymphoma, n (%)** | **N** | **5** | **0** | **1** | **4** | **0** |
| Complete response | 1 (20.0%) | 0 (0.0%) | 0 (0.0%) | 1 (25.0%) | 0 (0.0%) |
| Partial response | 2 (40.0%) | 0 (0.0%) | 1 (100.0%) | 1 (25.0%) | 0 (0.0%) |
| Stable disease | 1 (20.0%) | 0 (0.0%) | 0 (0.0%) | 1 (25.0%) | 0 (0.0%) |
| Progressive disease | 1 (20.0%) | 0 (0.0%) | 0 (0.0%) | 1 (25.0%) | 0 (0.0%) |
